# Supplementary material
Source: MDPI journal article supplement (https://www.mdpi.com/2076-3298/2/4/435)
Supplement: s1 [file s1]

## **Ministry Officials Questionnaire on Climate Change and Nigeria**

### **Introduction**

Climate change has become one of the most talked about environmental issues both nationally and internationally. The purpose of this questionnaire is to obtain information about your perception of climate change and how it relates to Nigeria.

### **Consent**

I am a researcher from the University of North Carolina at Chapel Hill and I am conducting a survey to learn about perception of climate change and how it relates to Nigeria. This survey will take approximately 10 minutes. You are being asked to be in the study because you a ministry official and thus, a policy/decision maker. The information that I collect will be used for research purposes and will be confidential. No personal information will be requested on this form and no information provided will make any of the participants identifiable. There is no penalty for refusing to fill out the survey and there are no consequences to filling it out either. If at any moment during completion of this questionnaire you are uncomfortable or do not wish to respond to a question you have the right not to respond. There are no risks or benefits from taking part in the study. If you choose to take part, you will be asked a series of questions about climate change and how it relates to Nigeria. These questions are below. If you agree to the information gathered below being used, please read the instructions and fill out the questionnaire. By filling out this survey, you are providing consent.

### **Instructions:**

Please fill out the form below, to the best of your knowledge by clicking boxes and providing short answers in the spaces provided. All answers are relevant to this research even when the answer is “I

don't know.” If you are unable to answer a question, leave it blank.

a. To what ministry or agency do you belong?

- Lagos State Ministry of Education
- Lagos State Ministry of Environment
- Lagos State Ministry of Rural Development
- Lagos Water Corporation
- Akwa Ibom Ministry of Education
- Akwa Ibom Ministry of Environment

b. What area(s) does your ministry serve primarily?

- Rural (Village)
- Urban (City)
- Both

c. What gender are you?

- Male
- Female

d. How long have you worked at the ministry or agency?

- 0 to 5 years
- 6 to 10 years
- 11 to 15 years
- 15 years or more

### **Climate Change information**

1. Human activity is responsible for climate change:

- Strongly Agree
- Somewhat Agree
- Don't Know
- Somewhat disagree

- Strongly Disagree
- I don't believe the global climate is changing

2. Natural variability is responsible for climate change:

- Strongly Agree
- Somewhat Agree
- Don't Know
- Somewhat disagree
- Strongly Disagree
- I don't believe the global climate is changing

3. Using the scale below, indicate the extent to which human activity and natural variability are responsible for causing climate change:  
Tick or circle option

|                                   |                                   |                          |                                                |                                                |
|-----------------------------------|-----------------------------------|--------------------------|------------------------------------------------|------------------------------------------------|
| Solely human activity responsible | Mainly human activity responsible | Both equally responsible | Mainly natural climate variability responsible | Solely natural climate variability responsible |
|-----------------------------------|-----------------------------------|--------------------------|------------------------------------------------|------------------------------------------------|

4. What do you think the effects of climate change are? Tick all that apply

- Sea level rise
- Drought
- Flooding
- Coastal erosion
- Rising temperatures
- Melting glaciers
- Desertification
- Increasing intensity and frequency of extreme weather events
- None
- Other (explain):  
\_\_\_\_\_

- I don't know

5. Which of the following do you think will affect Nigeria as a consequence of climate change? Tick all that apply.

- Sea level rise
- Drought
- Flooding
- Coastal erosion
- Rising temperatures
- Melting glaciers
- Desertification
- Increasing intensity and frequency of extreme weather events
- None
- Other (explain): \_\_\_\_\_
- I don't know

6. What region of Nigeria do you think is more vulnerable to the effects of climate change?

- Northern Nigeria. Why?  
\_\_\_\_\_
- Southern Nigeria. Why?  
\_\_\_\_\_
- Both equally vulnerable. Why?  
\_\_\_\_\_
- Other (explain) \_\_\_\_\_

7. What adaptation practices are currently in place to reduce the vulnerability of Nigeria's water resources to climate change impacts? Tick all that apply.

- Improved sanitation disposal to prevent contamination of water resources during floods
- Groundwater recharge

- Domestic water conservation promotion
- Surface water source protection
- Promotion of industrial and agricultural processes that minimize water demand
- None
- Other (explain): \_\_\_\_\_
- I don't know

8. What policies are currently in place to ensure effective adaptation of Nigeria's water resources to climate change impacts? Tick all that apply.

- Integration of climate change into water resource management
- Collaboration of different sectors to ensure effective response since water resources are utilized by numerous sectors
- Capacity building and institutional strengthening
- Awareness campaigns about climate change and its effects (Information dissemination)
- Improved research on climate change adaptation
- Community mobilization/involvement
- None
- Other (explain): \_\_\_\_\_
- I don't know

9. Who should be responsible for financing climate change adaptation measures? Tick all that apply.

- Nigerian government
- Developed countries
- Donor agencies
- Conservation Non-Governmental Organizations (NGOs)
- Industries

- No climate change adaptation measures are needed for Nigeria
- Other (explain): \_\_\_\_\_
- I don't know

10. To the best of your knowledge, are climate change awareness campaigns carried out in rural communities?

- Yes
- No

If Yes, please proceed to the next question.

If No, please skip to Question 14

11. How is climate change information disseminated in rural areas?

- Pamphlets
- Radios
- Television
- Newspapers/magazines
- Town criers
- Others(Name): \_\_\_\_\_

12. To the best of your knowledge, are climate change awareness campaigns carried out in urban areas?

- Yes
- No

If Yes, please proceed to the next question.

If No, please skip to Question 13

13. How is climate change information disseminated in urban areas?

- Pamphlets
- Radios
- Television
- Newspapers/magazines

Other (Name): \_\_\_\_\_

14. To the best of your knowledge, do the schools in the state in which your ministry operates teach students about climate change?

Yes

No

If Yes, please proceed to the next question.

If No, please skip to Question 16.

15. What schools have climate change in their curriculum? Tick all that apply.

Primary schools

Secondary schools

Universities

Polytechnics

16. To the best of your knowledge, are climate change awareness campaigns carried out at the schools in the state in which your ministry operates?

Yes

No

If Yes, please proceed to the next question.

If No, please skip to Question 18.

17. In what schools are climate change awareness campaigns carried out? Tick all that apply.

Primary schools

Secondary schools

Universities

Polytechnics

18. Of the ten environmental issues listed below, please choose ONLY three you believe should be the top priorities of the country.

Overpopulation

Urbanization

Deforestation

Climate Change

Desertification

Pollution

Environmental Education

Recycling

Renewable Energy

Other (name): \_\_\_\_\_

19. What are your THREE main sources of climate change information?

Internet

Conferences and Workshops

Television

Newspapers/magazines

Radio

Religious leaders

Government agencies

Non-Governmental Organizations (NGOs)

International Organizations

No sources of climate change information

Other: \_\_\_\_\_

## **Student Questionnaire on Climate Change and Nigeria**

### **Introduction**

Climate change has become one of the most talked about environmental issues both nationally and internationally. The purpose of this questionnaire is to obtain information about your perception of climate change and how it relates to Nigeria. No personal information will be requested on this form and no information provided will make any of the participants identifiable. There is no penalty for refusing to fill out the survey and there are no consequences to filling it out either. If you agree to the information gathered below being used, please read the instructions and fill out the questionnaire. You are not obligated to answer all questions and are free to skip any question for any reason.

### **Instructions:**

Please fill out the form below, to the best of your knowledge by ticking boxes and providing short answers in the spaces provided. If you are unable to answer a question, leave it blank.

e. What faculty are you in?

- Environmental sciences
- Engineering
- Law

f. In what area do you reside/live? (Choose where you spend most of the year)

- Rural (Village)
- Urban (City)

### **Climate Change information**

20. What does climate change mean to you? Tick all that apply

- Change in temperature
  - Change in the environment
  - Change in weather conditions
  - Change in climate due to human pollution
  - Change in climate due to global warming
  - I don't know
  - Other:
- 

21. What do you think are the effects of climate change? Tick all that apply

- Sea level rise
  - Drought
  - Flooding
  - Global warming
  - Rising temperatures
  - Increasing intensity and frequency of extreme weather events
  - Other:
- 

22. Which of the following do you think will affect Nigeria as a consequence of climate change? Tick all that apply.

- Sea level rise
- Drought
- Flooding
- Coastal erosion
- Rising temperatures
- Desertification
- Increasing intensity and frequency of extreme weather events

- None
- Other: \_\_\_\_\_

23. Who do you think is most vulnerable to the effects of climate change?

- Developed countries
- Developing countries
- Both equally vulnerable

24. What region of Nigeria do you think is more vulnerable to the effects of climate change?

- Northern Nigeria
- Southern Nigeria
- Both equally vulnerable

25. What changes would you be willing to make to increase your preparedness for the effects of climate change? Tick all that apply.

- Educating yourself more about climate change and its effects
- Promoting climate change awareness campaigns
- Advocating for climate change adaptation integration into community projects
- None
- Other: \_\_\_\_\_

26. Which of the following adaptation measures would you be willing to support? Tick all that apply.

27. Who should be responsible for financing climate change adaptation measures? Tick all that apply.
- Nigerian government
  - Developed countries
  - Donor agencies

- Conservation Non-Governmental Organizations (NGOs)
- Industries
- No climate change adaptation measures are needed for Nigeria
- Other: \_\_\_\_\_

28. Of the ten environmental issues listed below, please choose three you believe should be the top priorities of the country.

- Overpopulation
- Urbanization
- Deforestation
- Climate Change
- Desertification
- Pollution
- Environmental Education
- Recycling
- Renewable Energy

Are there any other environmental issues not mentioned above that you think should be top priorities of the country? If Yes what? -

\_\_\_\_\_

29. What are your main sources of climate change information? Tick all that apply.

- Internet
- School
- Government agencies
- Non-Governmental Organizations (NGOs)
- International Organizations
- No sources of climate change information
- Other: \_\_\_\_\_

30. To the best of your knowledge are climate change awareness campaigns carried out at your university?

Yes

No

If Yes, proceed to Question 10

If No, skip to Question 11

31. Do you attend climate change awareness campaigns at your university?

Yes

No

32. Were you taught about climate change in school?

Yes

No

If **Yes**, please briefly describe what you were taught.

---

---

---

---

---

---

If **Yes**, please proceed to question 33.

33. In what schools were you taught about climate change? Tick all that apply.

Primary school

Secondary school

University
